# Supplementary material for: Identification of New Vulnerabilities in Conjunctival Melanoma Using Image-Based High Content Drug Screening
Source: MDPI journal article supplement (doi:10.3390/cancers14061575), 2022-03-19
Supplement: s1 [file s1]

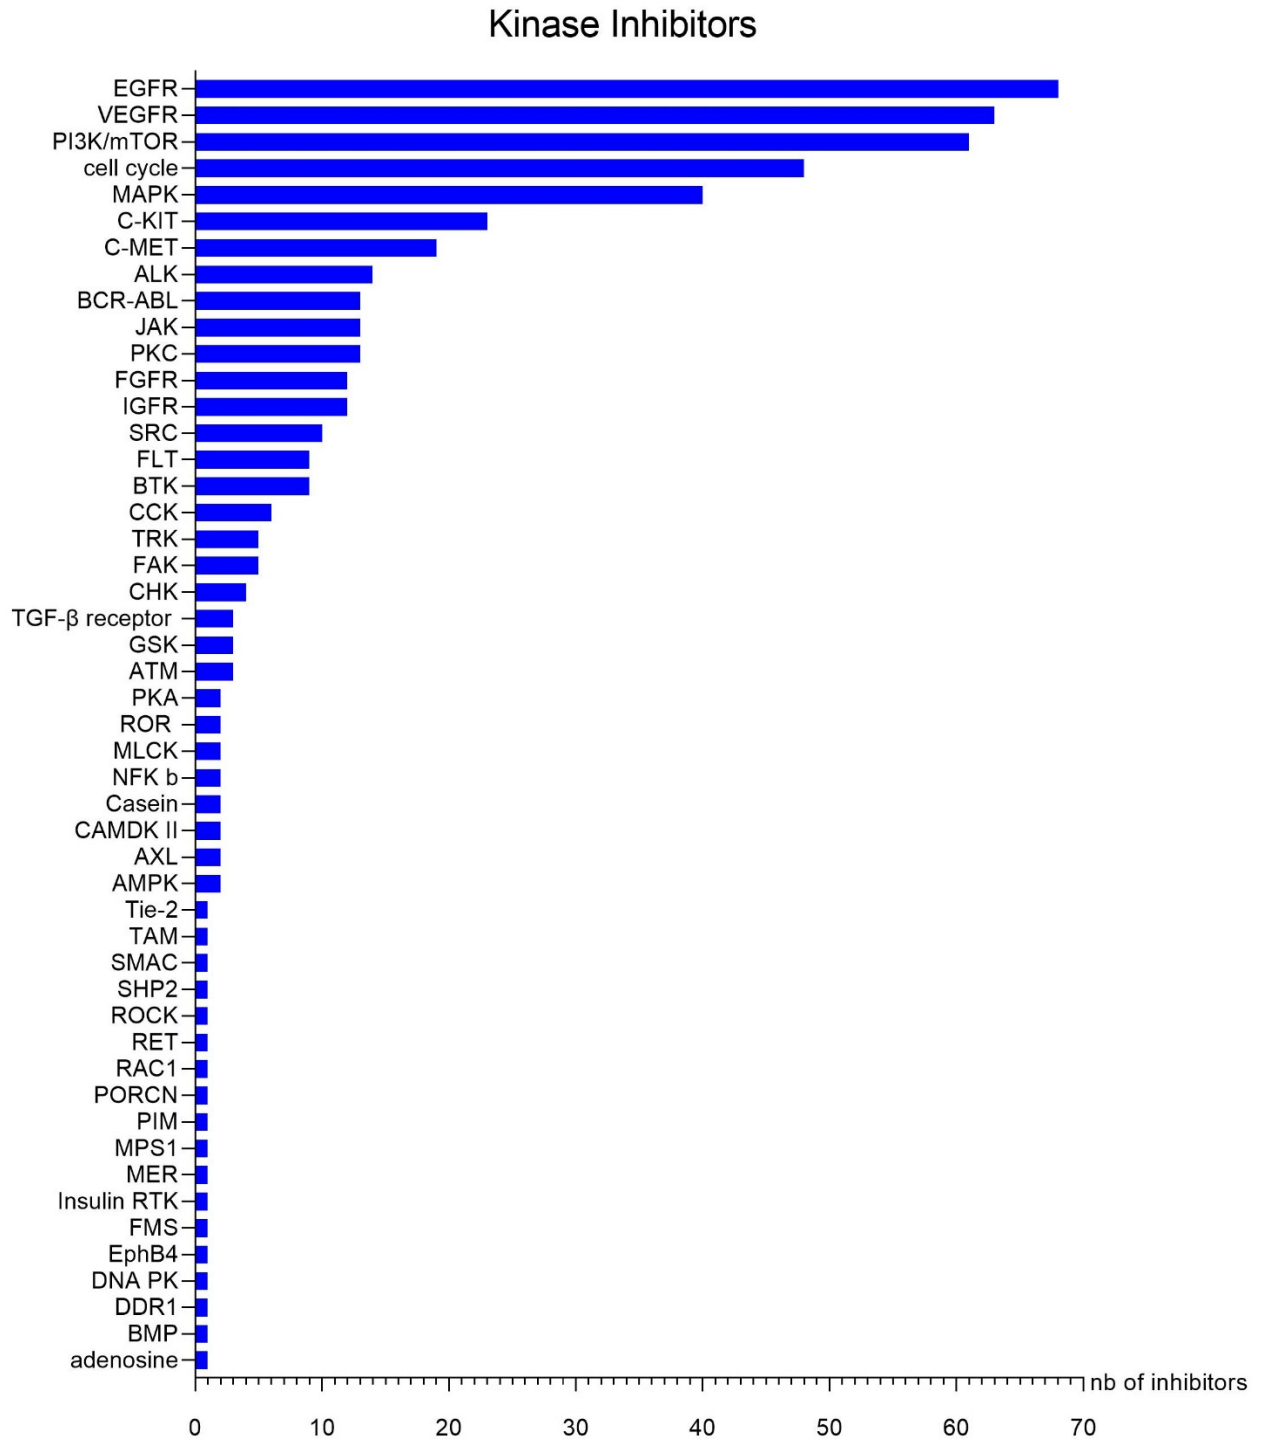

**Supplementary Figure S1: Kinase Inhibitor Library**

Many inhibitors targeted EGFR, VEGFR, PI3K/mTOR pathway, cell cycle or MAPK pathway.
