# Supplementary material for: Identification of New Vulnerabilities in Conjunctival Melanoma Using Image-Based High Content Drug Screening
Source: Cancers (Basel). 2022 Mar 19;14(6):1575. doi: 10.3390/cancers14061575 (PMC8946509; doi:10.3390/cancers14061575)
Supplement: Supplementary file 1 [file cancers-14-01575-s001.zip › supplementary Table S1.xlsx]

## Sheet: Variants
Cell line	Variant type	Gene	g. change (HGVS)	c. change (HGVS)	p. change (HGVS)	Allelic ratio	MutScore	COSMIC	ClinVar	gnomAD-exome-ALL	MaxEntScan
CM2005	missense	ARID1B	NC_000006.11:g.157150410T>C	NM_001374828.1:c.1841T>C	NP_001361757.1:p.(Met614Thr)	0.48	0.325	.	Likely benign	7.31e-05	.
CM2005	missense	BRAF	NC_000007.13:g.140453136A>T	NM_004333.5:c.1799T>A	NP_004324.2:p.(Val600Glu)	0.67	1	n=29,598 (n=6,285 malignant melanoma)	Pathogenic	4.07e-06	.
CM2005	missense	BRCA1	NC_000017.10:g.41228524T>C	NM_007294.4:c.4465A>G	NP_009225.1:p.(Lys1489Glu)	0.4	0.159	.	Uncertain significance	.	.
CM2005	missense	NSD1	NC_000005.9:g.176639164G>A	NM_022455.5:c.3764G>A	NP_071900.2:p.(Ser1255Asn)	0.35	0.04	.	.	4.07e-06	.
CRMM1	missense	ASXL1	NC_000020.10:g.31023055C>T	NM_015338.6:c.2540C>T	NP_056153.2:p.(Ser847Phe)	0.65	0.028	.	.	.	.
CRMM1	stopgain	ATR	NC_000003.11:g.142168287C>T	NM_001184.4:c.7919G>A	NP_001175.2:p.(Trp2640Ter)	0.64	.	n=1	.	.	.
CRMM1	missense	ATRX	NC_000023.10:g.76891437C>T	NM_000489.6:c.4668G>A	NP_000480.3:p.(Met1556Ile)	1	0.091	.	.	.	.
CRMM1	missense	BARD1	NC_000002.11:g.215645544C>T	NM_000465.4:c.1054G>A	NP_000456.2:p.(Val352Met)	0.61	0.045	.	Likely benign	.	.
CRMM1	missense	BRAF	NC_000007.13:g.140453136A>T	NM_004333.5:c.1799T>A	NP_004324.2:p.(Val600Glu)	0.48	1	n=29,598 (n=6,285 malignant melanoma)	Pathogenic	4.07e-06	.
CRMM1	intronic	CDKN2A	NC_000009.11:g.21994133C>T	NM_058195.4:c.193+5G>A	NP_478102.2:p.?	1	.	.	Pathogenic/Likely pathogenic	.	Disruption of 5' site in - strand, score from 9.79 to 6.68
CRMM1	missense	KDR	NC_000004.11:g.55971017G>A	NM_002253.3:c.1780C>T	NP_002244.1:p.(His594Tyr)	0.36	0.176	n=5 (n=1 malignant melanoma)	.	.	.
CRMM1	missense	KMT2D	NC_000012.11:g.49440155A>C	NM_003482.4:c.4471T>G	NP_003473.3:p.(Trp1491Gly)	0.51	0.834	.	.	.	.
CRMM1	missense	PDGFRB	NC_000005.9:g.149513449T>G	NM_002609.4:c.754A>C	NP_002600.1:p.(Lys252Gln)	0.39	0.025	.	.	.	.
CRMM1	missense	PLCB4	NC_000020.10:g.9449232T>C	NM_000933.3:c.3227T>C	NP_000924.3:p.(Met1076Thr)	0.49	0.624	.	.	.	.
CRMM1	missense	RB1	NC_000013.10:g.49030468C>T	NM_000321.3:c.1943C>T	NP_000312.2:p.(Ser648Leu)	0.48	0.797	.	.	.	.
CRMM1	missense	ROS1	NC_000006.11:g.117630045G>A	NM_002944.2:c.6481C>T	NP_002935.2:p.(Pro2161Ser)	1	0.872	(p.P2162L n=1)	.	.	.
CRMM1	missense	SMARCA4	NC_000019.9:g.11141502G>A	NM_003072.5:c.3479G>A	NP_003063.2:p.(Gly1160Glu)	0.65	0.983	n=3	Uncertain significance	.	.
CRMM1	frameshift deletion	TET2	NC_000004.11:g.106193913_106193925del	NM_001127208.3:c.4375_4387del	NP_001120680.1:p.(Glu1459LeufsTer7)	0.3	.	.	.	.	.
CRMM2	missense	ABL1	NC_000009.11:g.133760429C>T	NM_005157.6:c.2752C>T	NP_005148.2:p.(Pro918Ser)	0.64	0.128	(p.P937Q n=1, p.P937L n=4)	.	.	.
CRMM2	missense	ALK	NC_000002.11:g.29451758C>T	NM_004304.5:c.2807G>A	NP_004295.2:p.(Gly936Glu)	0.28	0.832	n=2 (n=1 malignant melanoma)	.	.	.
CRMM2	splicing	ATRX	NC_000023.10:g.76912042_76912052del	NM_000489.6:c.4213_4214+9del	NP_000480.3:p.?	1	.	.	.	.	.
CRMM2	frameshift deletion	BRCA2	NC_000013.10:g.32914158_32914169delinsA	NM_000059.4:c.5666_5677delinsA	NP_000050.3:p.(Ile1889LysfsTer7)	0.59	.	.	.	.	.
CRMM2	missense	CCND1	NC_000011.9:g.69466022C>T	NM_053056.3:c.860C>T	NP_444284.1:p.(Pro287Leu)	0.42	0.892	n=6 (n=1 malignant melanoma)	.	.	.
CRMM2	missense	FANCD2	NC_000003.11:g.10140492C>A	NM_001018115.3:c.4274C>A	NP_001018125.1:p.(Ala1425Asp)	0.77	0.01	.	.	4.06e-06	.
CRMM2	missense	FLT3	NC_000013.10:g.28609770C>T	NM_004119.3:c.1459G>A	NP_004110.2:p.(Ala487Thr)	0.27	0.016	.	.	.	.
CRMM2	missense	LRP5	NC_000011.9:g.68154171C>T	NM_002335.4:c.1403C>T	NP_002326.2:p.(Pro468Leu)	0.54	0.943	n=1	.	.	.
CRMM2	missense	MST1R	NC_000003.11:g.49940660G>A	NM_002447.4:c.383C>T	NP_002438.2:p.(Ala128Val)	0.76	0.014	.	.	6.64e-05	.
CRMM2	missense	NF1	NC_000017.10:g.29483004C>T	NM_001042492.3:c.64C>T	NP_001035957.1:p.(Pro22Ser)	0.35	0.742	n=2	Likely benign	.	.
CRMM2	missense	NRAS	NC_000001.10:g.115256529T>A	NM_002524.5:c.182A>T	NP_002515.1:p.(Gln61Leu)	0.84	0.872	n=379 (n=196 malignant melanoma)	Pathogenic/Likely pathogenic	.	.
