# Supplementary material for: Identification of New Vulnerabilities in Conjunctival Melanoma Using Image-Based High Content Drug Screening
Source: Cancers (Basel). 2022 Mar 19;14(6):1575. doi: 10.3390/cancers14061575 (PMC8946509; doi:10.3390/cancers14061575)
Supplement: Supplementary file 1 [file cancers-14-01575-s001.zip › Suppplementary Table S2.xlsx]

## Sheet: Feuil1
Name	Supplier	CM2005.1 (Avg_Value)	CM2005.1 (SD_Value)	CM2005.1 (HIT)	CRMM1 (Avg_Value)	CRMM1 (SD_Value)	CRMM1 (HIT)	CRMM2 (Avg_Value)	CRMM2 (SD_Value)	CRMM2 (HIT)
Flavopiridol (Alvocidib)	SelleckChem	1.11159	0.00890077	YES	1.11172	0.00871018	YES	1.00644	0.0141841	YES
SB1317	MedChemExpress	1.0936	0.0118682	YES	1.17458	0.0120957	YES	1.03067	0.00171016	YES
PIK-75	SelleckChem	1.09249	0.00332682	YES	1.10471	0.061286	YES	1.07584	0.00965904	YES
Flavopiridol	MedChemExpress	1.07104	0.00149624	YES	0.982389	0.00133256	YES	0.976225	0.0139792	YES
Dinaciclib	MedChem Express	1.04924	0.0053337	YES	1.28549	0.022397	YES	0.904053	0.0107334	YES
RGB-286638 (free base)	MedChemExpress	0.978139	0.0102701	YES	1.08049	0.0237368	YES	0.77228	0.0157577	YES
SNS-032 (BMS-387032)	SelleckChem	0.794334	0.0254157	YES	0.0581329	0.00788975	YES	0.362537	0.0367001	YES
Dabrafenib	Focus Biomolecules	0.691226	0.0108998	YES	0.00633062	0.00449083		0.0172057	0.00179282
AS703026	SelleckChem	0.615106	0.0190726	YES	0.0414924	0.00760756	YES	0.744782	0.0140877	YES
GSK1120212 (Trametinib)	SelleckChem	0.612242	0.0162089	YES	0.0645749	0.0131634	YES	0.853431	0.0203849	YES
PD0325901	SelleckChem	0.609966	0.0116121	YES	0.037254	0.00247312	YES	0.784596	0.00272581	YES
Cobimetinib	MedChem Express	0.609829	0.0111644	YES	0.0328658	0.00459312	YES	0.640671	0.0143985	YES
TAK-733	SelleckChem	0.60711	0.0075954	YES	0.0596856	0.00243181	YES	0.878453	0.00219155	YES
AZD8330	SelleckChem	0.576063	0.00488671	YES	0.0625401	0.00172439	YES	0.826124	0.0112735	YES
PD318088	SelleckChem	0.539044	0.0149495	YES	0.014838	0.00432199		0.572432	0.0271073	YES
Trametinib	Focus Biomolecules	0.517438	0.00503655	YES	0.00559596	0.000151697		0.34307	0.00831574	YES
AZD6244 (Selumetinib)	SelleckChem	0.506659	0.0312973	YES	0.00631004	0.00537441		0.352293	0.0207691	YES
NP-002654	Analyticon	0.484552	0.0101059	YES	0.231294	0.00483658	YES	0.173396	0.0154493	YES
17-Hydroxycalactin	Analyticon	0.442946	0.000445259	YES	0.146916	0.00089749	YES	0.179044	0.00752208	YES
NP-012576	Analyticon	0.437744	0.00219713	YES	0.161502	0.00734557	YES	0.16992	0.00273278	YES
CI-1040 (PD184352)	SelleckChem	0.361028	0.000624235	YES	-0.0192937	0.000598551		0.206096	0.000806221	YES
Ganetespib	MedChem Express	0.294015	0.0024464	YES	0.353423	0.00646215	YES	0.591855	0.0176184	YES
CHIR-124	SelleckChem	0.240948	0.0278151	YES	0.0476835	0.0196408	YES	0.6003	0.0140345	YES
KX2-391	SelleckChem	0.240948	0.0278151	YES	0.297556	0.0288142	YES	0.275493	0.000305874	YES
GDC-0994	MedChemExpress	0.218475	0.0246707	YES	-0.0252114	0.00178469		0.029697	0.00184062	YES
AZ 960	SelleckChem	0.211039	0.0176314	YES	0.178137	0.0180599	YES	0.508144	0.000789003	YES
PLX-4720	SelleckChem	0.196148	0.00273986	YES	-0.0385376	0.00348423		0.00586754	0.00154285
AZD7762	SelleckChem	0.188048	0.00740328	YES	0.205375	0.0207612	YES	0.677654	0.00300188	YES
AZD5438	SelleckChem	0.177516	0.0316808	YES	0.164551	0.0173267	YES	0.229993	0.0178799	YES
Tivantinib	MedChemExpress	0.173365	0.00371481	YES	0.0961822	0.00418002	YES	0.428842	0.00166465	YES
PF-04691502	SelleckChem	0.159292	0.00278783	YES	0.419011	0.0544563	YES	0.658887	0.00779896	YES
GSK2126458	SelleckChem	0.150627	0.000149933	YES	0.978896	0.0347931	YES	0.709508	0.00526546	YES
RAF265 (CHIR-265)	SelleckChem	0.143628	0.0128763	YES	-0.00927963	0.00240482		0.0428425	0.00131491	YES
Tivantinib	Cayman	0.137878	0.0106075	YES	0.0906962	0.00656819	YES	0.356842	0.0184954	YES
Hypericin	MedChemExpress	0.13656	0.0405203	YES	0.946352	0.281011	YES	0.560294	0.069372	YES
NMS-1286937	MedChemExpress	0.13586	0.0087664	YES	0.490904	0.0107567	YES	0.194311	0.00888498	YES
ON-01910	SelleckChem	0.129191	0.0170039	YES	0.242997	0.0104764	YES	0.228854	0.0144665	YES
Birinapant	MedChem Express	0.128884	0.00396089	YES	0.389305	0.0198089	YES	0.0194812	0.00293708	YES
HMN-214	SelleckChem	0.126408	0.00145825	YES	0.162065	0.00549339	YES	0.467758	0.00317792	YES
Torin 2	MedChemExpress	0.110459	0.00866882	YES	0.559259	0.0385212	YES	0.564014	0.0124018	YES
BI6727 (Volasertib)	SelleckChem	0.0681905	0.00125553	YES	0.193726	0.0102806	YES	0.0491027	0.00984965	YES
PI-103	SelleckChem	0.0544001	0.00557308	YES	0.041759	0.0125479	YES	0.342046	0.000850187	YES
GDC-0980 (RG7422)	SelleckChem	0.0491195	0.00887151	YES	0.0406416	0.00325141	YES	0.396657	0.00827119	YES
MLN8054	SelleckChem	0.0480258	0.000344312	YES	0.0416101	0.00162231	YES	0.078109	0.000947412	YES
VRT752271	MedChem Express	0.0475263	0.00669518	YES	-0.0377619	0.00595991		0.0245934	0.00352442	YES
AT9283	MedChemExpress	0.0468935	0.00773963	YES	0.146347	0.020097	YES	0.136458	0.00679135	YES
5-Iodotubericidin	Selleck Chemicals	0.0445375	0.0042895	YES	0.293836	0.0169142	YES	0.0075734	0.00324871
Belinostat	MedChem Express	0.0422687	0.00146021	YES	0.138931	0.0104025	YES	0.0280529	0.00130947	YES
MLN8237 (Alisertib)	SelleckChem	0.0410788	0.0043117	YES	0.127082	0.0037833	YES	0.055358	0.0047325	YES
INK-128	MedChemExpress	0.0405942	0.00551396	YES	0.364037	0.00185519	YES	0.351084	0.00874818	YES
CUDC-101	MedChemExpress	0.0405898	0.00435935	YES	0.14695	0.00213246	YES	0.127891	0.00630026	YES
AZD8055	SelleckChem	0.038773	0.0043265	YES	0.2587	0.0390324	YES	0.342047	0.00256279	YES
AZD2014	MedChemExpress	0.034799	0.000281252	YES	0.0597673	0.00455013	YES	0.271033	0.0101452	YES
WYE-125132	SelleckChem	0.0347415	0.00377595	YES	0.329602	0.0293119	YES	0.397796	0.0139599	YES
BKM120 (NVP-BKM120)	SelleckChem	0.0261207	0.000203699	YES	0.0364698	0.00559418	YES	0.20894	0.000899218	YES
GSK461364	SelleckChem	0.0249604	0.000956604	YES	0.410636	0.013365	YES	0.0348801	0.00472495	YES
A-674563	SelleckChem	0.0197834	0.000739447	YES	0.209916	0.0136172	YES	0.0832346	0.0155505	YES
LY2603618 (IC-83)	SelleckChem	0.0157668	0.0035958	YES	0.0147557	0.00861315		0.190738	0.00136939	YES
KG-5	Tocris Bioscience	0.0111362	0.00135973	YES	0.00883404	0.00579276		0.178465	0.00468099	YES
Rapamycin (Sirolimus)	SelleckChem	0.0105602	0.000680242	YES	-0.00479019	0.00572581		0.129874	0.00419112	YES
PD-166285	TargetMol	-0.00966004	0.00218392		0.0619043	0.00599734	YES	0.193236	0.00700862	YES
